# Supplementary material for: Clinical Benefit from Docetaxel +/− Ramucirumab Is Not Associated with Mutation Status in Metastatic Non-Small-Cell Lung Cancer Patients Who Progressed on Platinum Doublets and Immunotherapy
Source: MDPI journal article supplement (doi:10.3390/cancers16050935), 2024-02-26
Supplement: s1 [file s1]

Supplementary Table S1. Baseline Numbers of Patients in Each Treatment Group

|                                                 | <b>Overall<br/>(N=454)</b> | <b>MDA cohort<br/>(N=304)</b> | <b>Mayoclinic cohort<br/>(N=150)</b> |
|-------------------------------------------------|----------------------------|-------------------------------|--------------------------------------|
| <b>Docetaxel monotherapy N=178</b>              | N=178                      | N=99                          | N=79                                 |
| <b>Docetaxel+Ramucirumab N=203</b>              | N=203                      | N=142                         | N=61                                 |
| <b>Platinum-Taxane-ICI-AI N=35</b>              |                            |                               |                                      |
| Carboplatin+Paclitaxel+Atezolizumab+Bevacizumab | N=35                       | N=28                          | N=7                                  |
| <b>Platinum-Taxane-AI N=6</b>                   |                            |                               |                                      |
| Carboplatin+Paclitaxel+Bevacizumab              | N=6                        | N=4                           | N=2                                  |
| <b>Platinum-Taxane-ICI N=19</b>                 |                            |                               |                                      |
| Carboplatin+Paclitaxel+Atezolizumab             | N=2                        | N=1                           | N=1                                  |
| Carboplatin+Docetaxel+Pembrolizumab             | N=4                        | N=4                           | N=0                                  |
| Carboplatin+Paclitaxel+Pembrolizumab            | N=10                       | N=10                          | N=0                                  |
| Carboplatin+Paclitaxel+Nivolumab                | N=1                        | N=1                           | N=0                                  |
| Cisplatin+Paclitaxel+Pembrolizumab              | N=2                        | N=2                           | N=0                                  |
| <b>Platinum-Taxane N=13</b>                     |                            |                               |                                      |
| Carboplatin+Docetaxel                           | N=7                        | N=7                           | N=0                                  |
| Carboplatin+Paclitaxel                          | N=6                        | N=6                           | N=0                                  |

Abbreviations: ICI, Immune checkpoint inhibitors; AI, anti-angiogenesis inhibitor.

Supplementary Table S2. Mono-Variate Analysis for Selected Factors for PFS and OS of Patients with Docetaxel+/-Ramucirumab Treatment

| Characteristics          |                | Docetaxel Monotherapy |         |                 |         | Docetaxel+Ramucirumab |         |                 |         | Docetaxel+/-Ramucirumab |         |                 |         |
|--------------------------|----------------|-----------------------|---------|-----------------|---------|-----------------------|---------|-----------------|---------|-------------------------|---------|-----------------|---------|
|                          |                | PFS                   |         | OS              |         | PFS                   |         | OS              |         | PFS                     |         | OS              |         |
|                          |                | HR(95% CI)            | P value | HR(95% CI)      | P value | HR(95% CI)            | P value | HR(95% CI)      | P value | HR(95% CI)              | P value | HR(95% CI)      | P value |
| <b>Age</b>               |                |                       | 0.59    |                 | 0.83    |                       | 0.97    |                 | 0.19    |                         | 0.79    |                 | 0.41    |
|                          | ≥65            | 1                     |         | 1               |         | 1                     |         | 1               |         | 1                       |         | 1               |         |
| <b>Gender</b>            | <65            | 1.09(0.80-1.48)       |         | 1.04(0.75-1.45) |         | 0.99(0.74-1.33)       |         | 0.80(0.57-1.12) |         | 1.03(0.83-1.27)         |         | 0.90(0.71-1.15) |         |
|                          |                |                       | 0.38    |                 | 0.68    |                       | 0.07    |                 | 0.006*  |                         | 0.045*  |                 | 0.022*  |
|                          | Male           | 1                     |         | 1               |         | 1                     |         | 1               |         | 1                       |         | 1               |         |
|                          | Female         | 0.87(0.64-1.18)       |         | 0.93(0.67-1.30) |         | 0.76(0.56-1.02)       |         | 0.78(0.66-0.89) |         | 0.81(0.65-1.00)         |         | 0.76(0.60-0.96) |         |
| <b>Smoking history</b>   |                |                       | 0.71    |                 | 0.09    |                       | 0.58    |                 | 0.95    |                         | 0.91    |                 | 0.25    |
|                          | Current/Former | 1                     |         | 1               |         | 1                     |         | 1               |         | 1                       |         | 1               |         |
| <b>Histology</b>         | Never          | 0.94(0.66-1.33)       |         | 0.72(0.49-1.05) |         | 1.10(0.79-1.52)       |         | 1.01(0.83-1.22) |         | 1.01(0.80-1.29)         |         | 0.85(0.65-1.12) |         |
|                          |                |                       | 0.60    |                 | 0.08    |                       | 0.33    |                 | 0.11    |                         | 0.26    |                 | 0.015*  |
|                          | ADC            | 1                     |         | 1               |         | 1                     |         | 1               |         | 1                       |         | 1               |         |
|                          | Non-ADC        | 1.11(0.74-1.67)       |         | 1.46(0.96-2.23) |         | 1.22(0.81-1.84)       |         | 0.83(0.65-1.04) |         | 1.18(0.89-1.57)         |         | 1.47(1.08-2.02) |         |
| <b>ECOG</b>              |                |                       | 0.08    |                 | 0.004*  |                       | 0.36    |                 | 0.022*  |                         | 0.05*   |                 | <0.001* |
|                          | ≥2             | 1                     |         | 1               |         | 1                     |         | 1               |         | 1                       |         | 1               |         |
| <b>Line of treatment</b> | 0-1            | 0.73(0.52-1.04)       |         | 0.57(0.39-0.83) |         | 0.85(0.60-1.21)       |         | 0.63(0.4-0.9)   |         | 0.78(0.61-1.00)         |         | 0.59(0.45-0.78) |         |
|                          |                |                       | 0.60    |                 | 0.60    |                       | 0.62    |                 | 0.37    |                         | 0.84    |                 | 0.60    |
|                          | ≥3             | 1                     |         | 1               |         | 1                     |         | 1               |         | 1                       |         | 1               |         |
|                          | 2              | 1.09(0.79-1.49)       |         | 1.10(0.78-1.55) |         | 0.93(0.69-1.25)       |         | 1.08(0.91-1.28) |         | 0.98(0.79-1.21)         |         | 0.94(0.74-1.19) |         |

|                           |                     |            |                     |      |                     |      |                     |      |                     |      |                     |      |  |
|---------------------------|---------------------|------------|---------------------|------|---------------------|------|---------------------|------|---------------------|------|---------------------|------|--|
| <b>Brain metastasis</b>   |                     |            |                     |      |                     |      |                     |      |                     |      |                     |      |  |
| Yes                       | 1                   | 0.16       | 1                   | 0.42 | 1                   | 0.85 | 1                   | 0.11 | 1                   | 0.50 | 1                   | 0.44 |  |
| No                        | 0.80(0.58<br>-1.09) |            | 0.87(0.62<br>-1.22) |      | 1.03(0.77<br>-1.38) |      | 1.32(0.94<br>-1.86) |      | 0.93(0.75<br>-1.15) |      | 1.10(0.87<br>-1.40) |      |  |
| <b>Liver metastasis</b>   |                     |            |                     |      |                     |      |                     |      |                     |      |                     |      |  |
|                           |                     | 0.90       |                     | 0.14 |                     | 0.11 |                     | 0.75 |                     | 0.19 |                     | 0.62 |  |
| Yes                       | 1                   |            | 1                   |      | 1                   |      | 1                   |      | 1                   |      | 1                   |      |  |
| No                        | 1.02(0.70<br>-1.50) |            | 0.74(0.50<br>-1.11) |      | 1.33(0.94<br>-1.88) |      | 0.97(0.80<br>-1.18) |      | 1.18(0.92<br>-1.52) |      | 0.93(0.71<br>-1.23) |      |  |
| <b>Bone metastasis</b>    |                     |            |                     |      |                     |      |                     |      |                     |      |                     |      |  |
| Yes                       | 1                   | 0.50       | 1                   | 0.84 | 1                   | 0.73 | 1                   | 0.26 | 1                   | 0.46 | 1                   | 0.59 |  |
| No                        | 0.90(0.66<br>-1.22) |            | 1.04(0.74<br>-1.45) |      | 1.03(0.89<br>-1.19) |      | 1.10(0.93<br>-1.32) |      | 0.92(0.75<br>-1.14) |      | 0.94(0.74<br>-1.19) |      |  |
| <b>Adrenal metastasis</b> |                     |            |                     |      |                     |      |                     |      |                     |      |                     |      |  |
| Yes                       | 1                   | 0.02<br>2* | 1                   | 0.36 | 1                   | 0.38 | 1                   | 0.40 | 1                   | 0.35 | 1                   | 0.88 |  |
| No                        | 0.64(0.44<br>0.94)  |            | 0.83(0.55<br>-1.24) |      | 0.91(0.73<br>-1.13) |      | 0.90(0.70<br>-1.15) |      | 0.88(0.66<br>-1.16) |      | 0.98(0.71<br>-1.34) |      |  |

Abbreviations: ICI, Immune checkpoint inhibitors; AI, anti-angiogenesis inhibitors; NSCLC, non-small cell lung cancer; TX, treatment; ECOG PS, Eastern Cooperative Oncology Group performance status; ADC, adenocarcinoma; SQC, squamous cell carcinoma; HR, hazard ratio.

Supplementary Table S3. Multi-variate Analysis for Selected Factors for PFS and OS of Patients with Docetaxel+/-Ramucirumab Treatment

| Characteristics               | Docetaxel Monotherapy |         |                     |         | Docetaxel+<br>Ramucirumab |         |                     |         | Docetaxel+/-Ramucirumab |         |                     |         |
|-------------------------------|-----------------------|---------|---------------------|---------|---------------------------|---------|---------------------|---------|-------------------------|---------|---------------------|---------|
|                               | PFS                   |         | OS                  |         | PFS                       |         | OS                  |         | PFS                     |         | OS                  |         |
|                               | HR(95%<br>CI)         | P value | HR(95%<br>CI)       | P value | HR(95%<br>CI)             | P value | HR(95%<br>CI)       | P value | HR(95%<br>CI)           | P value | HR(95%<br>CI)       | P value |
| <b>Gender</b>                 |                       |         |                     |         | /                         | /       |                     |         |                         |         |                     |         |
| Male                          |                       |         |                     |         |                           |         | 1                   | 0.008*  | 1                       | 0.041*  | 1                   | 0.03*   |
| Female                        |                       |         |                     |         |                           |         | 0.63(0.44<br>-0.85) |         | 1.25(1.01<br>-1.54)     |         | 0.77(0.61<br>-0.98) |         |
| <b>Histology</b>              |                       |         |                     |         | /                         | /       |                     |         |                         |         |                     |         |
| ADC                           |                       |         |                     |         |                           |         |                     |         |                         |         | 1                   | 0.08    |
| Non-ADC                       |                       |         |                     |         |                           |         |                     |         |                         |         | 1.33(0.97<br>-1.83) |         |
| <b>ECOG</b>                   |                       |         |                     |         |                           |         |                     |         |                         |         |                     |         |
| 0-1                           | 1                     | 0.07    | 1                   | 0.004*  |                           |         | 1                   | 0.035*  | 1                       | 0.047*  | 1                   | <0.001* |
| ≥2                            | 0.72(0.51<br>-1.03)   |         | 0.57(0.39<br>-0.84) |         |                           |         | 1.54(1.03<br>-2.30) |         | 1.28(1.00<br>-1.64)     |         | 0.60(0.46<br>-0.79) |         |
| <b>Adrenal<br/>metastasis</b> |                       |         |                     |         |                           |         |                     |         |                         |         |                     |         |
| Yes                           | 1                     | 0.018*  | 1                   | 0.39    |                           |         |                     |         |                         |         |                     |         |
| No                            | 0.63(0.43<br>-0.93)   |         | 0.84(0.56<br>-1.26) |         |                           |         |                     |         |                         |         |                     |         |

Abbreviations: ICI, Immune checkpoint inhibitors; AI, anti-angiogenesis inhibitors; NSCLC, non-small cell lung cancer; TX, treatment; ECOG PS, Eastern Cooperative Oncology Group performance status; ADC, adenocarcinoma; SQC, squamous cell carcinoma; HR, hazard ratio.

Supplementary Table S4. Survival of Patients in Different Groups Based on Demographic Factors

| Characteristics        |                | Docetaxel monotherapy |                  |                     |                  | Docetaxel+Ramucirumab |                  |                     |                  | Overall Docetaxel+/-Ramucirumab |                  |                     |                  |
|------------------------|----------------|-----------------------|------------------|---------------------|------------------|-----------------------|------------------|---------------------|------------------|---------------------------------|------------------|---------------------|------------------|
|                        |                | PFS<br>Median(95%CI)  | Log-rank P-value | OS<br>Median(95%CI) | Log-rank P-value | PFS<br>Median(95%CI)  | Log-rank P-value | OS<br>Median(95%CI) | Log-rank P-value | PFS<br>Median(95%CI)            | Log-rank P-value | OS<br>Median(95%CI) | Log-rank P-value |
| <b>Age</b>             | ≥65            | 3.50(2.52-4.48)       | 0.59             | 7.30(5.58-9.02)     | 0.83             | 4.24(3.44-5.04)       | 0.97             | 8.60(5.99-11.21)    | 0.19             | 3.91(3.26-4.56)                 | 0.79             | 7.86(6.40-9.33)     | 0.40             |
|                        | <65            | 3.00(2.18-3.82)       |                  | 7.90(5.39-10.41)    |                  | 4.04(3.25-4.83)       |                  | 9.30(6.81-11.79)    |                  | 3.55(2.94-4.16)                 |                  | 8.67(6.93-10.42)    |                  |
| <b>Gender</b>          | Male           | 3.25(2.61-3.89)       | 0.37             | 7.17(5.57-8.77)     | 0.68             | 3.83(2.99-4.68)       | 0.06             | 7.33(5.68-8.98)     | 0.005*           | 3.50(2.98-4.02)                 | 0.04*            | 7.33(6.19-8.47)     | 0.02*            |
|                        | Female         | 3.30(2.44-4.16)       |                  | 7.90(5.44-10.36)    |                  | 4.83(4.05-5.61)       |                  | 11.23(7.27-15.19)   |                  | 4.01(3.05-4.97)                 |                  | 9.76(7.97-11.55)    |                  |
| <b>Smoking history</b> | Current/Former | 3.25(2.63-3.87)       | 0.71             | 7.30 (6.32-8.28)    | 0.09             | 4.18(3.67-4.69)       | 0.58             | 9.47(7.19-11.75)    | 0.95             | 3.85(3.34-4.36)                 | 0.91             | 8.10(6.71-9.49)     | 0.24             |
|                        | Never          | 3.30(1.79-4.81)       |                  | 11.80 (5.50-18.10)  |                  | 3.50(2.01-4.99)       |                  | 8.17(7.01-9.33)     |                  | 3.43(2.18-4.68)                 |                  | 8.60(5.24-11.96)    |                  |
| <b>Histology</b>       | ADC            | 3.20(2.57-3.83)       | 0.60             | 8.40(6.25-10.55)    | 0.07             | 4.27(3.72-4.82)       | 0.33             | 8.93(6.86-11.00)    | 0.11             | 3.85(3.29-4.41)                 | 0.26             | 8.67(7.17-10.17)    | 0.02*            |
|                        | Non-ADC        | 3.55(2.37-4.73)       |                  | 6.51(5.01-8.01)     |                  | 3.45(1.60-5.30)       |                  | 6.94(2.98-10.90)    |                  | 3.45(2.77-4.13)                 |                  | 6.51(4.86-8.16)     |                  |
| <b>ECOG</b>            | ≥2             | 2.83(1.95-3.71)       | 0.08             | 6.64(4.80-8.48)     | 0.003*           | 3.45(2.25-4.65)       | 0.36             | 6.73(3.04-10.42)    | 0.02*            | 3.20(2.40-4.00)                 | 0.05*            | 6.64(4.53-8.75)     | <.001*           |
|                        | 0-1            | 3.50(2.92-4.09)       |                  | 8.40(6.15-10.65)    |                  | 4.37(3.71-5.03)       |                  | 9.30(6.99-11.61)    |                  | 4.01(3.51-4.51)                 |                  | 8.93(7.39-10.47)    |                  |

|                           |     |                 |                  |                 |                   |                 |                  |
|---------------------------|-----|-----------------|------------------|-----------------|-------------------|-----------------|------------------|
| <b>Line of treatment</b>  |     | 0.60            | 0.60             | 0.62            | 0.37              | 0.84            | 0.60             |
|                           | ≥3  | 3.40(2.68-4.12) | 8.40(6.16-10.64) | 4.40(3.88-4.93) | 8.17(5.62-10.72)  | 3.90(3.33-4.47) | 8.17(6.42-9.92)  |
|                           | 2   | 3.00(2.20-3.80) | 6.64(5.51-7.77)  | 3.83(2.85-4.81) | 9.30(7.17-11.43)  | 3.43(2.72-4.14) | 8.60(7.00-10.20) |
| <b>Brain metastasis</b>   |     | 0.15            | 0.42             | 0.85            | 0.11              | 0.50            | 0.43             |
|                           | Yes | 2.87(2.08-3.66) | 7.40(5.18-9.62)  | 4.17(3.59-4.75) | 11.54(8.50-14.58) | 3.50(2.71-4.29) | 9.47(6.71-12.23) |
|                           | No  | 3.68(2.97-4.39) | 7.86(5.63-10.09) | 4.17(3.18-5.16) | 8.10(6.39-9.81)   | 3.90(3.30-4.50) | 7.93(6.71-9.16)  |
| <b>Liver metastasis</b>   |     | 0.90            | 0.14             | 0.11            | 0.75              | 0.19            | 0.62             |
|                           | Yes | 3.00(0.32-5.68) | 6.20(5.26-7.14)  | 4.14(2.79-5.49) | 7.33(2.18-12.48)  | 3.00(1.76-4.24) | 6.84(5.76-7.92)  |
|                           | No  | 3.30(2.70-3.90) | 8.60(6.54-10.66) | 4.27(3.79-4.75) | 8.93(7.44-10.42)  | 3.80(3.30-4.30) | 8.67(7.45-9.89)  |
| <b>Bone metastasis</b>    |     | 0.49            | 0.84             | 0.73            | 0.26              | 0.46            | 0.59             |
|                           | Yes | 3.00(2.38-3.62) | 7.40(4.31-10.49) | 4.17(3.67-4.67) | 8.67(7.02-10.32)  | 3.70(3.70-4.28) | 7.90(6.40-9.40)  |
|                           | No  | 3.72(2.72-4.72) | 7.86(5.97-9.75)  | 4.17(2.95-5.39) | 10.93(7.12-14.74) | 3.90(3.30-4.50) | 8.60(7.02-10.18) |
| <b>Adrenal metastasis</b> |     | 0.02*           | 0.36             | 0.38            | 0.40              | 0.35            | 0.88             |
|                           | Yes | 2.87(2.19-3.55) | 6.64(1.79-11.49) | 5.16(4.89-5.43) | 10.93(2.30-19.56) | 3.03(2.30-3.76) | 8.63(5.26-12.00) |
|                           | No  | 3.68(2.82-4.54) | 7.86(5.75-9.97)  | 3.93(3.31-4.55) | 8.67(7.14-10.20)  | 3.85(3.36-4.34) | 8.17(6.98-9.37)  |

Abbreviations: ADC, adenocarcinoma; ECOG, Eastern Cooperative Oncology Group performance status.

Supplementary Table S5. Justified HRs for Selected Molecular Markers in Patients with Docetaxel+/-Ramucirumab Treatment

| Molecular alterations | Docetaxel monotherapy |         |                 |         | Docetaxel+ramucirumab |         |                 |         | Docetaxel+/- ramucirumab |         |                 |         |
|-----------------------|-----------------------|---------|-----------------|---------|-----------------------|---------|-----------------|---------|--------------------------|---------|-----------------|---------|
|                       | PFS                   |         | OS              |         | PFS                   |         | OS              |         | PFS                      |         | OS              |         |
|                       | HR(95%CI)             | P value | HR(95%CI)       | P value | HR(95%CI)             | P value | HR(95%CI)       | P value | HR(95%CI)                | P value | HR(95%CI)       | P value |
| <b>TP53</b>           |                       |         |                 |         |                       |         |                 |         |                          |         |                 |         |
| TP53-mut              | 1                     | 0.22    | 1               | 0.37    | 1                     | 0.97    | 1               | 0.67    | 1                        | 0.28    | 1               | 0.46    |
| TP53-wt               | 0.81(0.58-1.13)       |         | 1.17(0.83-1.67) |         | 1.01(0.74-1.37)       |         | 1.08(0.76-1.55) |         | 1.13(0.91-1.41)          |         | 0.91(0.71-1.17) |         |
| <b>KRAS</b>           |                       | 0.94    |                 | 0.94    |                       | 0.27    |                 | 0.80    |                          | 0.38    |                 | 0.86    |
| KRAS-mut              | 1                     |         | 1               |         | 1                     |         | 1               |         | 1                        |         | 1               |         |
| KRAS -wt              | 0.99(0.69-1.41)       |         | 1.01(0.69-1.49) |         | 1.19(0.87-1.62)       |         | 1.05(0.73-1.50) |         | 1.11(0.88-1.40)          |         | 1.02(0.79-1.32) |         |
| <b>EGFR</b>           |                       | 0.48    |                 | 0.09    |                       | 0.37    |                 | 0.42    |                          | 0.89    |                 | 0.09    |
| EGFR-mut              | 1                     |         | 1               |         | 1                     |         | 1               |         | 1                        |         | 1               |         |
| EGFR--wt              | 0.88(0.61-1.2)        |         | 0.70(0.46-1.06) |         | 0.84(0.58-1.23)       |         | 1.21(0.77-1.91) |         | 0.98(0.77-1.28)          |         | 1.31(0.96-1.78) |         |
| <b>STK11</b>          |                       |         |                 |         |                       |         |                 |         |                          |         |                 |         |
| STK11-mut             | 1                     | 0.55    | 1               | 0.24    | 1                     | 0.40    | 1               | 0.16    | 1                        | 0.96    | 1               | 0.26    |
| STK11-wt              | 1.81(0.69-2.02)       |         | 1.42(0.80-2.52) |         | 1.26(0.74-2.12)       |         | 0.80(0.59-1.09) |         | 1.01(0.69-1.47)          |         | 0.80(0.53-1.19) |         |
| <b>ERBB2(HER2)</b>    |                       |         |                 |         |                       |         |                 |         |                          |         |                 |         |
| ERBB2-mut             | 1                     | 0.07    | 1               | 0.63    | 1                     | 0.35    | 1               | 0.66    | 1                        | 0.09    | 1               | 0.74    |
| ERBB2-wt              | 1.77(0.95-3.29)       |         | 1.17(0.61-2.25) |         | 1.30(0.75-2.27)       |         | 1.15(0.61-2.16) |         | 0.70(0.47-1.06)          |         | 0.93(0.59-1.45) |         |
| <b>MET</b>            |                       |         |                 |         |                       |         |                 |         |                          |         |                 |         |
| MET-mut               | 1                     | 0.49    | 1               | 0.37    | 1                     | 0.34    | 1               | 0.90    | 1                        | 0.37    | 1               | 0.26    |
| MET-wt                | 0.83(0.48-1.42)       |         | 0.71(0.39-1.26) |         | 1.25(0.74-2.12)       |         | 0.89(0.50-1.60) |         | 1.01(0.64-1.47)          |         | 0.80(0.53-1.19) |         |
| <b>PIK3CA</b>         |                       |         |                 |         |                       |         |                 |         |                          |         |                 |         |
| PIK3CA-mut            | 1                     | 0.06    | 1               | 0.37    | 1                     | 0.26    | 1               | 0.42    | 1                        | 0.91    | 1               | 0.19    |

|           |                      |                     |                     |                     |                     |                     |
|-----------|----------------------|---------------------|---------------------|---------------------|---------------------|---------------------|
| PIK3CA-wt | 1.31 (0.88-<br>2.21) | 1.37(0.69-<br>2.72) | 1.56(0.72-<br>3.34) | 0.71(0.31-<br>1.63) | 0.97(0.58-<br>1.61) | 1.42(0.84-<br>2.39) |
|-----------|----------------------|---------------------|---------------------|---------------------|---------------------|---------------------|

---

Abbreviations: TP53: tumor protein 53; KRAS: Kirsten rat sarcoma virus; EGFR: epidermal growth factor receptor; BRAF: The V-Raf Murine Sarcoma Viral Oncogene Homolog B; STK11: serine/threonine kinase 11; ERBB2(Receptor tyrosine-protein kinase erbB-2); MET: The mesenchymal epithelial transition factor receptor; PIK3CA: phosphatidylinositol-4,5-bisphosphate 3-kinase catalytic subunit alpha.



Supplementary Table S6. Comparison of Distribution of Significant Factors Between Docetaxel+/-Ramucirumab and Platinum-Taxane Groups

|                           | Docetaxel+/-Ramucirumab | Taxane+Platinum | P value |
|---------------------------|-------------------------|-----------------|---------|
| <b>Gender</b>             |                         |                 | 0.75    |
| Male                      | 195                     | 36              |         |
| Female                    | 186                     | 37              |         |
| <b>Histology</b>          |                         |                 | 0.09    |
| ADC                       | 316                     | 55              |         |
| Non-ADC                   | 65                      | 18              |         |
| <b>ECOG</b>               |                         |                 | 0.12    |
| ≥2                        | 87                      | 18              |         |
| 0-1                       | 294                     | 55              |         |
| <b>Adrenal metastasis</b> |                         |                 | 0.21    |
| Yes                       | 64                      | 8               |         |
| No                        | 317                     | 65              |         |
| <b>Brain metastasis</b>   |                         |                 | 0.23    |
| Yes                       | 154                     | 24              |         |
| No                        | 227                     | 49              |         |

Abbreviations: ADC adenocarcinoma; ECOG, Eastern Cooperative Oncology Group performance status.
